# Supplementary figures and images for: Inflammation and fibrosis in the coal dust-exposed lung described by confocal Raman spectroscopy
Source: PeerJ journal article supplement (doi:10.7717/peerj.13632), 2022-06-23

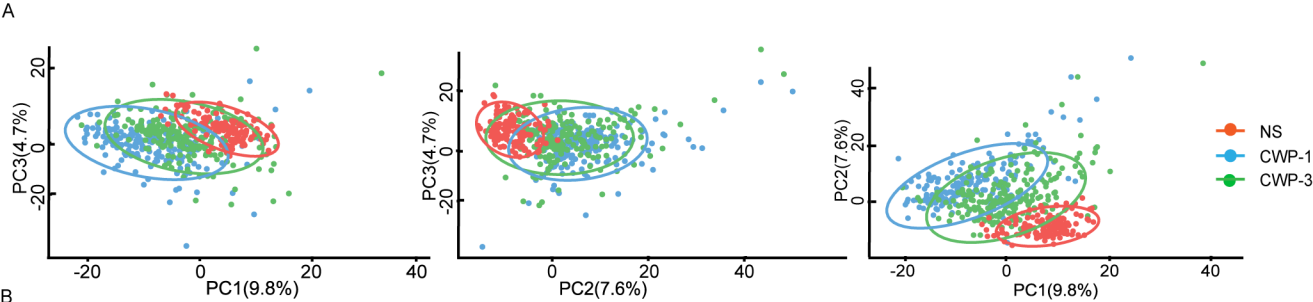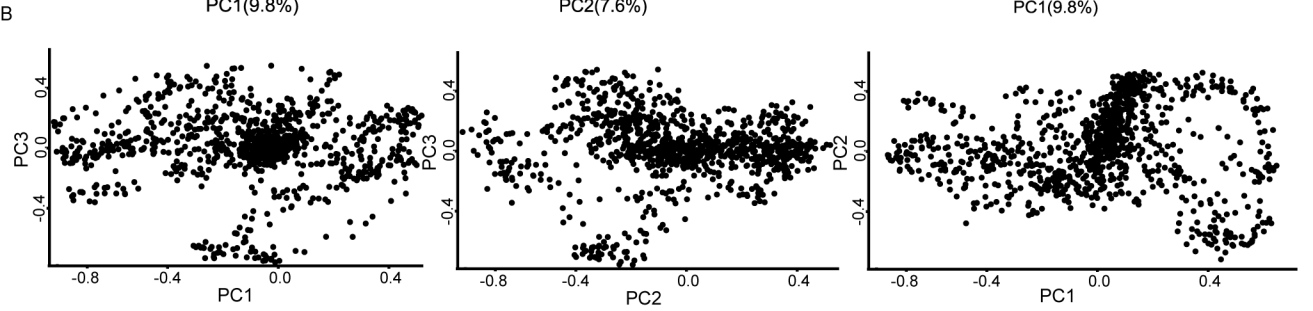

Supplement: Supplemental_Figure_S1.pdf [file Supplemental_Figure_S1.pdf]
